# Supplementary material for: Iron-catalyzed cross-coupling reaction: recyclable heterogeneous iron catalyst for selective olefination of aryl iodides in poly(ethylene glycol) medium
Source: Royal Society of Chemistry journal article supplement (doi:10.1039/c3gc36761d), 2013-01-01
Supplement: c3gc36761d.pdf [file c3gc36761d.pdf]

# Iron-Catalyzed Cross-Coupling Reaction: Recyclable Heterogeneous Iron Catalyst for Selective olefination of Aryl Iodides in poly(ethylene glycol) Medium

Abdol Reza Hajipour,<sup>\*a,b</sup> Ghobad Azizi<sup>b</sup>

*a* Pharmaceutical Research Laboratory, Department of Chemistry, Isfahan University of Technology, Isfahan 84156, IR Iran. Corresponding Author Tel.: +98 311 391 3262; fax: +98 311 391 2350. E-mail address: haji@cc.iut.ac.ir

*b* Dept. of Neuroscience, University of Wisconsin, Medical School, 1300 University Avenue, Madison, 53706-1532, WI, USA

## Electronic Supplementary Information

### Aryl iodides were prepared according to our previous procedure:

Iodoaryl derivatives synthesized from aniline derivatives using aryldiazonium silica sulfates according to our previous procedure<sup>1</sup> Aniline derivatives (2 mmol), silica sulfuric acid (1.5 g) and NaNO<sub>2</sub> (4 mmol) were ground with a pestle in a mortar for a few minutes. Two drops of water were added and the reaction mixture was ground until gas evolution stopped. Next, KI (5 mmol) was added to the mortar and grinding was continued. The mixture was diluted with EtOAc (12 mL) and filtered after vigorous stirring. The residue was extracted with EtOAc (3 × 12 mL) and the combined organic layer was washed with a 10% aq Na<sub>2</sub>SO<sub>3</sub> solution and then dried over anhydrous Na<sub>2</sub>SO<sub>4</sub>. The solvent was evaporated in vacuum to afford desired aryl iodides.

The XPS analysis was used to detect the oxidation state of all species in the catalyst. Fig. S1 shows the survey spectrum of catalyst. From Fig. S1, it is obvious that Element C was present in the catalyst. Fig. S2 illustrates the C<sub>1s</sub> spectrum, in which the peak centered at 292 eV is attributed to C species, which originated from the acetyl acetone and propyl moiety, suggesting that acetyl acetone existed in the catalyst. Fig. S3 displays the XPS spectrum of Fe<sub>2p</sub>. The peak at 711 eV is attributed to Fe III species. From XPS analysis, it can be deduced that the iron(III) species are present in the catalyst composition. Figures S4 and S5 showed the XPS spectra of O<sub>1s</sub> and Si<sub>2p</sub> respectively.

Figure 6S shows the XRD patterns of SiO<sub>2</sub>-FeIII (acac) catalyst, compared with original Fe(acac)<sub>3</sub>.

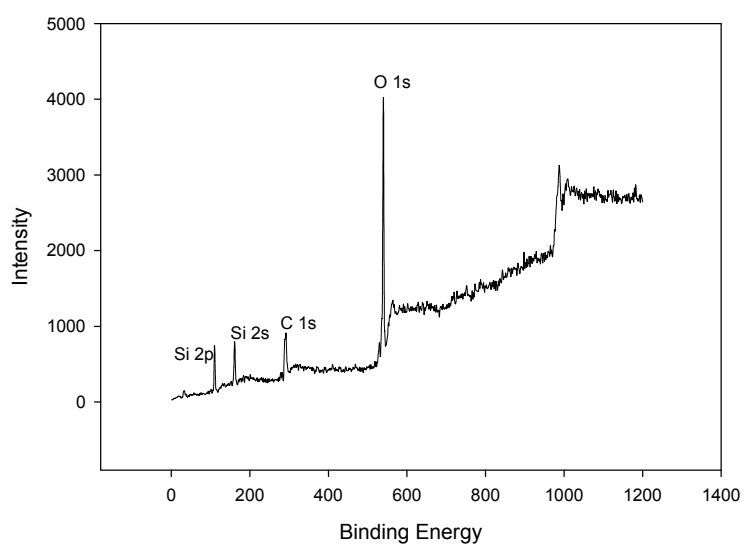

Fig. S1 Survey XPS spectrum of SiO<sub>2</sub>-FeIII (acac)

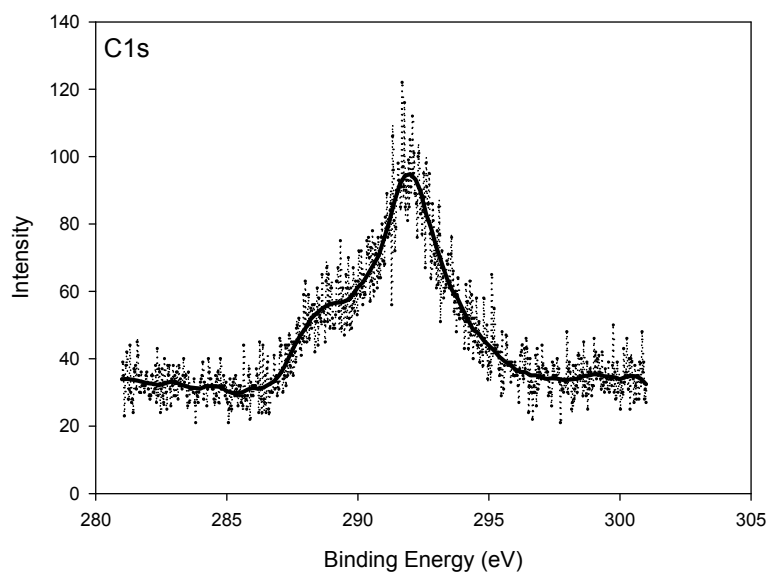

Fig. S2 XPS spectrum of the carbon 1s edge of the SiO<sub>2</sub>-FeIII (acac) sample

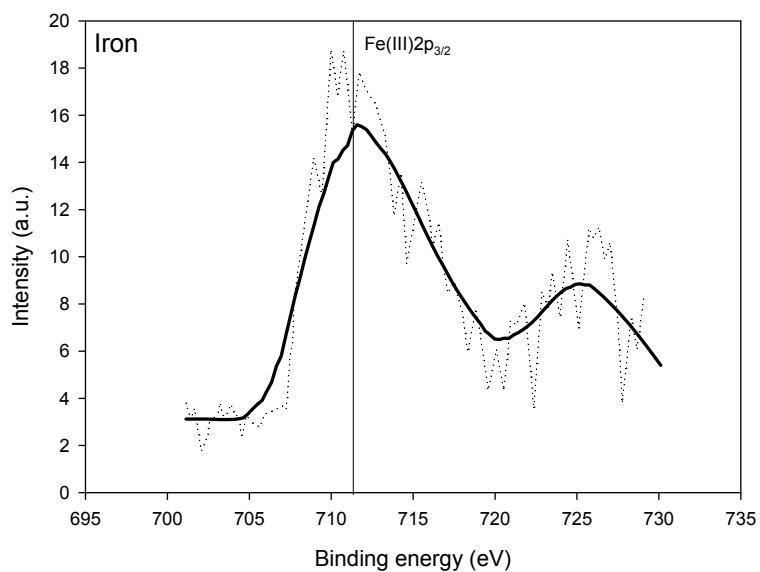

Fig. S3 XPS spectrum of the Fe 2p edge of the SiO<sub>2</sub>-FeIII (acac) sample

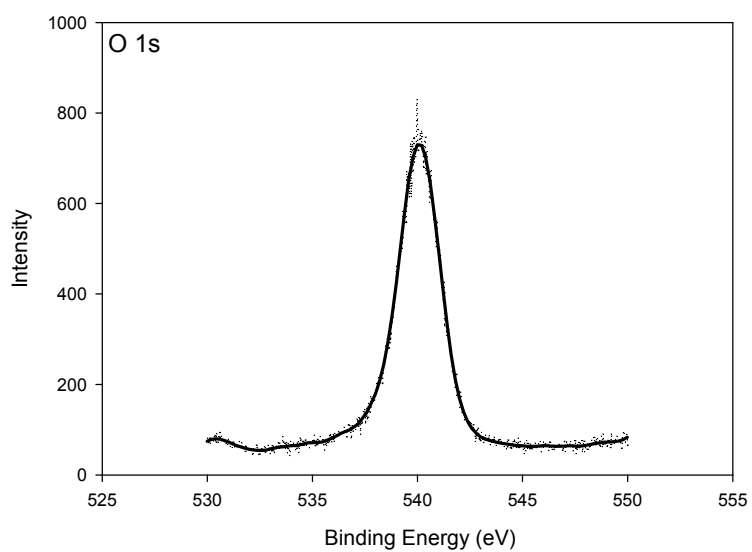

Fig. S4 XPS spectrum of the oxygen 1s edge of the SiO<sub>2</sub>-FeIII (acac) sample

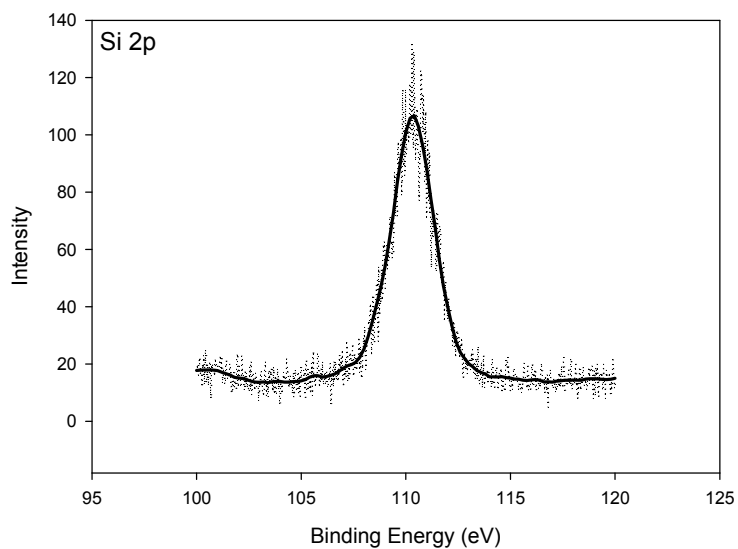

Fig. S5 XPS spectrum of the Si 2p edge of the SiO<sub>2</sub>-FeIII (acac) sample

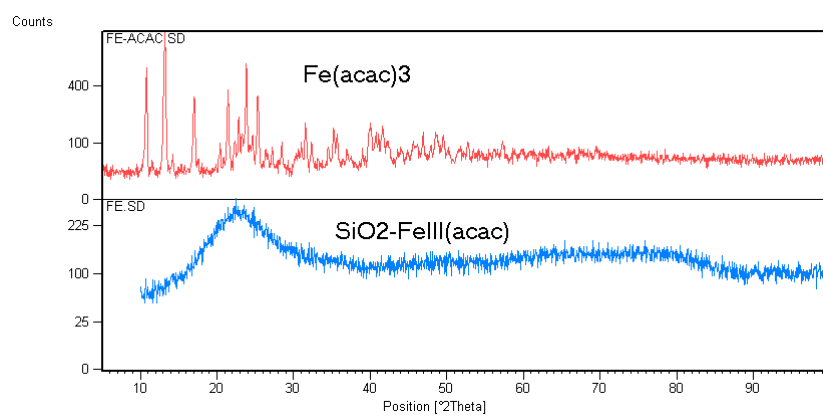

Fig. S6 XRD patterns of SiO<sub>2</sub>-FeIII (acac) catalyst sample, compared with Fe(acac)<sub>3</sub>.

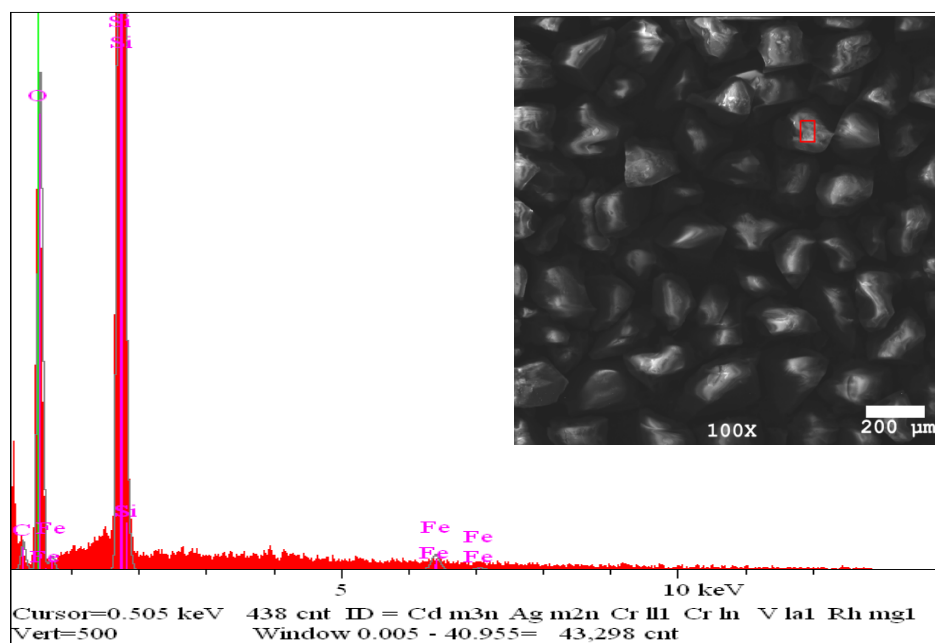

Fig. S7 EDX spectrum of SiO<sub>2</sub>-FeIII(acac) catalyst sample.

#### References

- 1 A.Zarei, A. R. Hajipour, L. Khazdooz, *synthesis*, 2009, 941-944.
